# Supplementary material for: Performance evaluation of indel calling tools using real short-read data
Source: PubMed Central journal article supplement (PMC4545535; doi:10.1186/s40246-015-0042-2), 2015-08-19
Supplement: 40246_2015_42_MOESM1_ESM.pdf [file 40246_2015_42_MOESM1_ESM.pdf]

## Supplementary Material

### Performance evaluation of indel calling tools using real short-read data

Mohammad Shabbir Hasan<sup>1</sup>, Xiaowei Wu<sup>2</sup>, Liqing Zhang<sup>1\*</sup>

<sup>1</sup>Department of Computer Science

<sup>2</sup>Department of Statistics

Virginia Tech., Blacksburg, VA 24061

E-mail: {shabbir5, xwwu, lqzhang}@vt.edu

\* - Corresponding Author

#### Supplemental Tables:

Supplemental Table S1: List of the input samples with corresponding population and read coverage

| Sample ID | Sample  | Ethnic Background                          | Average Coverage |
|-----------|---------|--------------------------------------------|------------------|
| 1         | HG00151 | GBR (British in England and Scotland)      | 4.07945          |
| 2         | HG00154 | GBR (British in England and Scotland)      | 4.55756          |
| 3         | HG00157 | GBR (British in England and Scotland)      | 4.97155          |
| 4         | HG00171 | FIN (Finnish in Finland)                   | 3.42147          |
| 5         | HG00174 | FIN (Finnish in Finland)                   | 3.75145          |
| 6         | HG00190 | FIN (Finnish in Finland)                   | 3.3264           |
| 7         | HG00553 | PUR (Puerto Rican in Puerto Rico)          | 3.20752          |
| 8         | HG00560 | CHS (Han Chinese South)                    | 3.6613           |
| 9         | HG00565 | CHS (Han Chinese South)                    | 3.77876          |
| 10        | HG00580 | CHS (Han Chinese South)                    | 4.11136          |
| 11        | HG00637 | PUR (Puerto Rican in Puerto Rico)          | 3.46052          |
| 12        | HG00638 | PUR (Puerto Rican in Puerto Rico)          | 4.41764          |
| 13        | HG00844 | CDX (Chinese Dai in Xishuangbanna, China)  | 10.4013          |
| 14        | HG00851 | CDX (Chinese Dai in Xishuangbanna, China)  | 11.7362          |
| 15        | HG00864 | CDX (Chinese Dai in Xishuangbanna, China)  | 3.86342          |
| 16        | HG01356 | CLM (Colombian in Medellin, Colombia)      | 4.68011          |
| 17        | HG01357 | CLM (Colombian in Medellin, Colombia)      | 4.63414          |
| 18        | HG01377 | CLM (Colombian in Medellin, Colombia)      | 4.65449          |
| 19        | HG01524 | IBS (Spanish Iberian populations in Spain) | 7.26326          |
| 20        | HG01525 | IBS (Spanish Iberian populations in Spain) | 6.60486          |
| 21        | HG01531 | IBS (Spanish Iberian populations in Spain) | 6.93617          |

|    |         |                                                                  |         |
|----|---------|------------------------------------------------------------------|---------|
| 22 | HG01599 | KHV (Kinh in Ho Chi Minh City, Vietnam)                          | 4.52677 |
| 23 | HG01860 | KHV (Kinh in Ho Chi Minh City, Vietnam)                          | 7.76182 |
| 24 | HG01861 | KHV (Kinh in Ho Chi Minh City, Vietnam)                          | 7.47835 |
| 25 | HG01882 | ACB (African Caribbean in Barbados)                              | 8.37547 |
| 26 | HG01883 | ACB (African Caribbean in Barbados)                              | 7.84466 |
| 27 | HG01892 | PEL (Peruvian in Lima, Peru)                                     | 5.82321 |
| 28 | HG01893 | PEL (Peruvian in Lima, Peru)                                     | 6.20132 |
| 29 | HG01914 | ACB (African Caribbean in Barbados)                              | 5.9745  |
| 30 | HG01923 | PEL (Peruvian in Lima, Peru)                                     | 6.97538 |
| 31 | HG02813 | GWD (Gambian in Western Division, The Gambia)                    | 6.23018 |
| 32 | HG02814 | GWD (Gambian in Western Division, The Gambia)                    | 6.10095 |
| 33 | HG02839 | GWD (Gambian in Western Division, The Gambia)                    | 6.80767 |
| 34 | HG03009 | BEB (Bengali in Bangladesh)                                      | 6.04669 |
| 35 | HG03234 | PJL (Punjabi in Lahore, Pakistan)                                | 7.25371 |
| 36 | HG03235 | PJL (Punjabi in Lahore, Pakistan)                                | 6.17131 |
| 37 | HG03268 | ESN (Esan in Nigeria)                                            | 6.89912 |
| 38 | HG03470 | MSL (Mende in Sierra Leon)                                       | 9.82357 |
| 39 | HG03473 | MSL (Mende in Sierra Leon)                                       | 7.319   |
| 40 | HG03514 | ESN (Esan in Nigeria)                                            | 6.48069 |
| 41 | HG03515 | ESN (Esan in Nigeria)                                            | 8.20044 |
| 42 | HG03571 | MSL (Mende in Sierra Leon)                                       | 4.89722 |
| 43 | HG03619 | PJL (Punjabi in Lahore, Pakistan)                                | 7.67182 |
| 44 | HG03645 | STU (Sri Lankan Tamil in the UK)                                 | 5.22783 |
| 45 | HG03646 | STU (Sri Lankan Tamil in the UK)                                 | 5.4842  |
| 46 | HG03777 | ITU (Indian Telugu in the UK)                                    | 6.40374 |
| 47 | HG03785 | ITU (Indian Telugu in the UK)                                    | 5.9841  |
| 48 | HG03790 | ITU (Indian Telugu in the UK)                                    | 6.51514 |
| 49 | HG03808 | BEB (Bengali in Bangladesh)                                      | 5.84893 |
| 50 | HG03809 | BEB (Bengali in Bangladesh)                                      | 5.32334 |
| 51 | HG03999 | STU (Sri Lankan Tamil in the UK)                                 | 5.76619 |
| 52 | NA07000 | CEU (Utah residents with Northern and Western European ancestry) | 10.4452 |
| 53 | NA07357 | CEU (Utah residents with Northern and Western European ancestry) | 6.18814 |
| 54 | NA12234 | CEU (Utah residents with Northern and Western European ancestry) | 7.08588 |
| 55 | NA18550 | CHB (Han Chinese in Beijing, China)                              | 7.78798 |
| 56 | NA18570 | CHB (Han Chinese in Beijing, China)                              | 7.96559 |
| 57 | NA18582 | CHB (Han Chinese in Beijing, China)                              | 8.63521 |

|    |         |                                                   |         |
|----|---------|---------------------------------------------------|---------|
| 58 | NA18944 | JPT (Japanese in Tokyo, Japan)                    | 5.58686 |
| 59 | NA18973 | JPT (Japanese in Tokyo, Japan)                    | 4.97637 |
| 60 | NA19005 | JPT (Japanese in Tokyo, Japan)                    | 7.20848 |
| 61 | NA19238 | YRI (Yoruba in Ibadan, Nigeria)                   | 4.92286 |
| 62 | NA19239 | YRI (Yoruba in Ibadan, Nigeria)                   | 4.67774 |
| 63 | NA19240 | YRI (Yoruba in Ibadan, Nigeria)                   | 4.59382 |
| 64 | NA19429 | LWK (Luhya in Webuye, Kenya)                      | 6.02545 |
| 65 | NA19443 | LWK (Luhya in Webuye, Kenya)                      | 10.5005 |
| 66 | NA19462 | LWK (Luhya in Webuye, Kenya)                      | 6.48215 |
| 67 | NA19725 | MXL (Mexican Ancestry in Los Angeles, California) | 6.03405 |
| 68 | NA19755 | MXL (Mexican Ancestry in Los Angeles, California) | 5.9912  |
| 69 | NA19764 | MXL (Mexican Ancestry in Los Angeles, California) | 6.82051 |
| 70 | NA19913 | ASW (African Ancestry in Southwest US)            | 6.52439 |
| 71 | NA20357 | ASW (African Ancestry in Southwest US)            | 6.66108 |
| 72 | NA20359 | ASW (African Ancestry in Southwest US)            | 6.20712 |
| 73 | NA20510 | TSI (Toscani in Italia)                           | 6.61414 |
| 74 | NA20518 | TSI (Toscani in Italia)                           | 7.91557 |
| 75 | NA20529 | TSI (Toscani in Italia)                           | 5.98378 |
| 76 | NA20863 | GIH (Gujarati Indian in Houston, TX)              | 7.7302  |
| 77 | NA20867 | GIH (Gujarati Indian in Houston, TX)              | 6.00576 |
| 78 | NA20868 | GIH (Gujarati Indian in Houston, TX)              | 6.68754 |

Supplemental Table S2: P-value for Chi-square statistical test of indel size distribution between the tools.

|                 | <b>VarScan</b> | <b>Pindel</b> | <b>SAMtools</b> | <b>Dindel</b> | <b>GATK_HC</b> | <b>Platypus</b> |
|-----------------|----------------|---------------|-----------------|---------------|----------------|-----------------|
| <b>GATK_UG</b>  | 0.99           | 0.69          | 0.8             | 0.27          | 0.35           | 0.99            |
| <b>VarScan</b>  |                | 0.58          | 0.57            | 0.21          | 0.27           | 0.98            |
| <b>Pindel</b>   |                |               | 0.71            | 0.98          | 0.99           | 0.88            |
| <b>SAMtools</b> |                |               |                 | 0.96          | 0.98           | 0.58            |
| <b>Dindel</b>   |                |               |                 |               | 0.99           | 0.83            |
| <b>GATK_HC</b>  |                |               |                 |               |                | 0.80            |

**Supplemental Figures:**

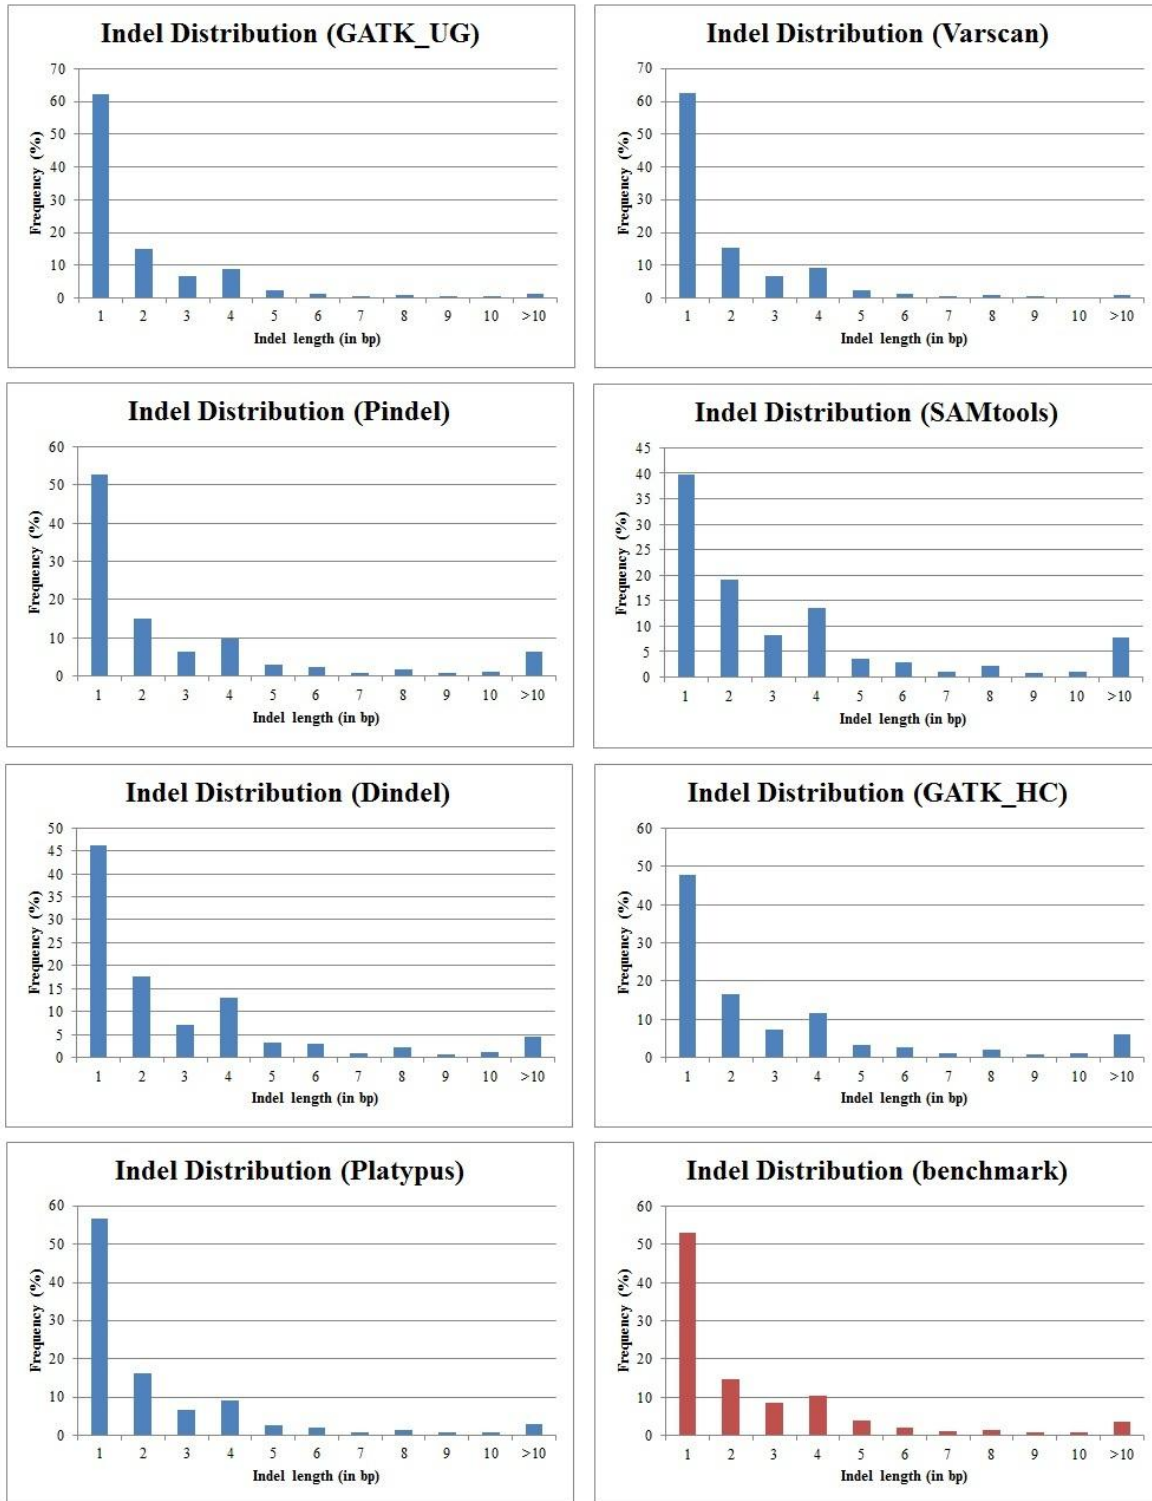

**Supplemental Figure 1:** Distribution of indels based on lengths (1 to 10 bp) for GATK\_UG, Varscan, Pindel, SAMtools, Dindel, GATK\_HC, Platypus and Benchmark dataset.

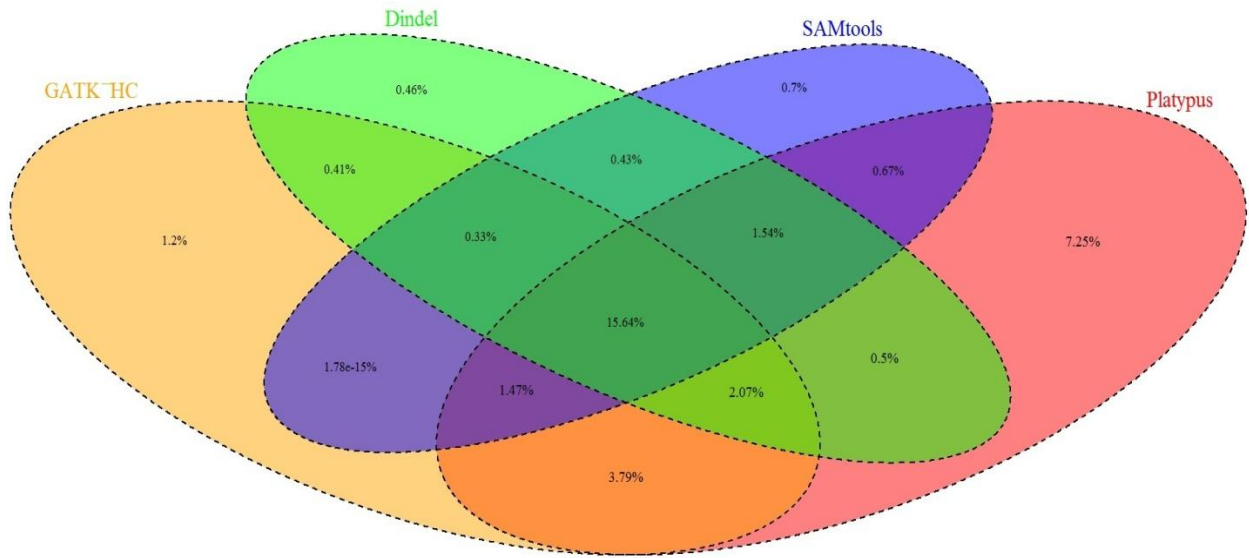

**Supplemental Figure 2:** Intra-tool comparison among GATK\_HC, Dindel, SAMtools, and Platypus for percentage of their own indels called by others.

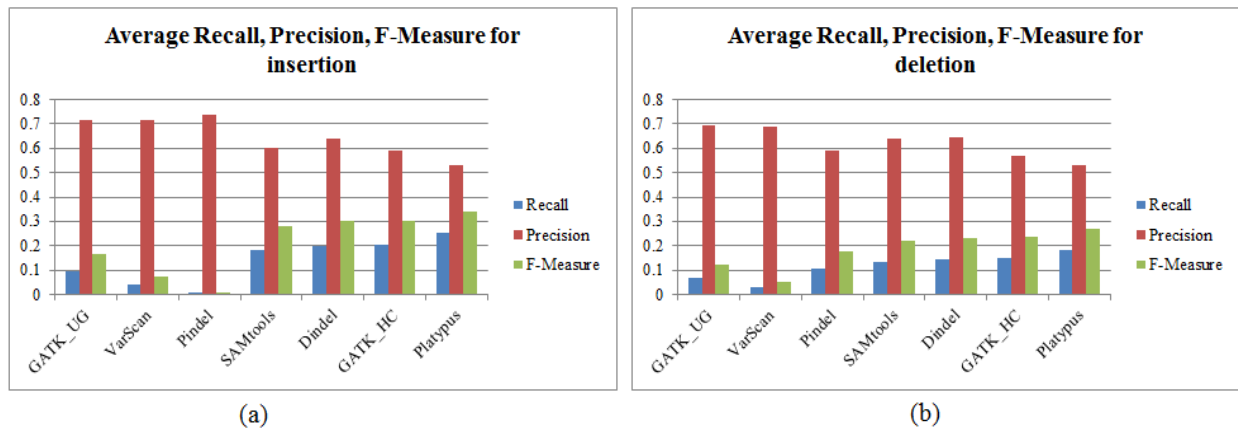

**Supplemental Figure 3:** Average Recall, Precision, and F-Measure of each tool for (a) insertion and (b) deletion.

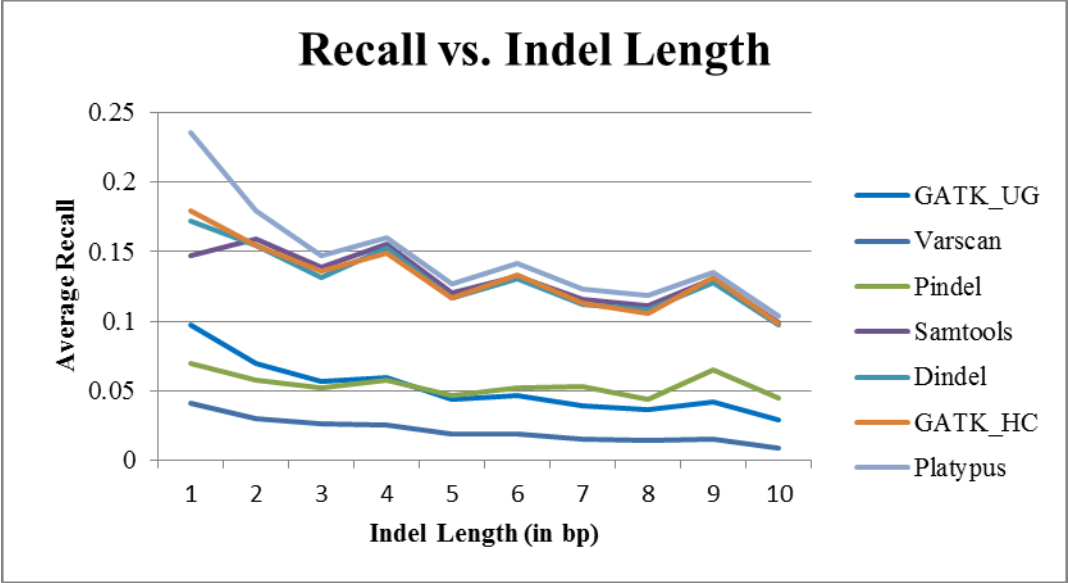

Supplemental Figure 4: Average recall for each tool for different lengths of indels.

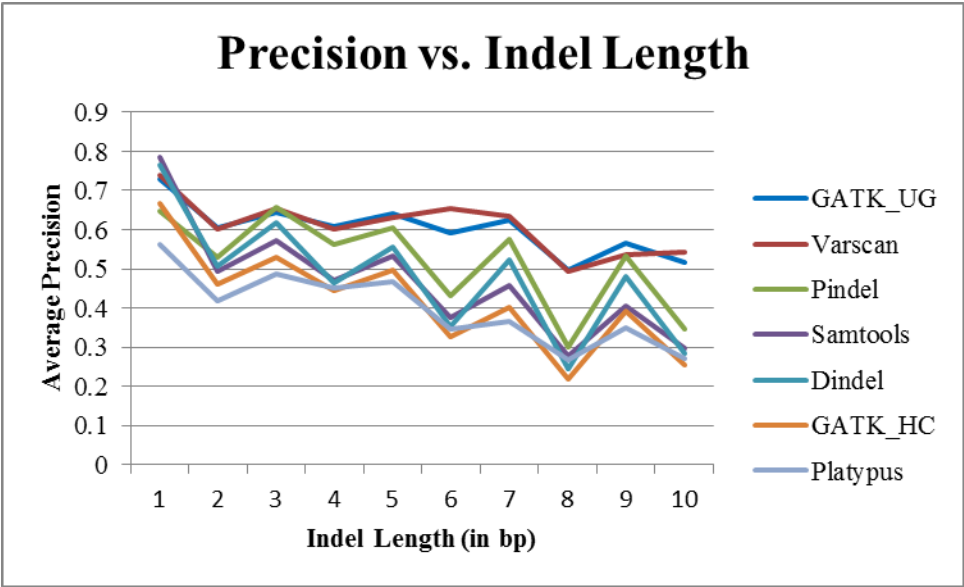

Supplemental Figure 5: Average precision for each tool for different lengths of indels.

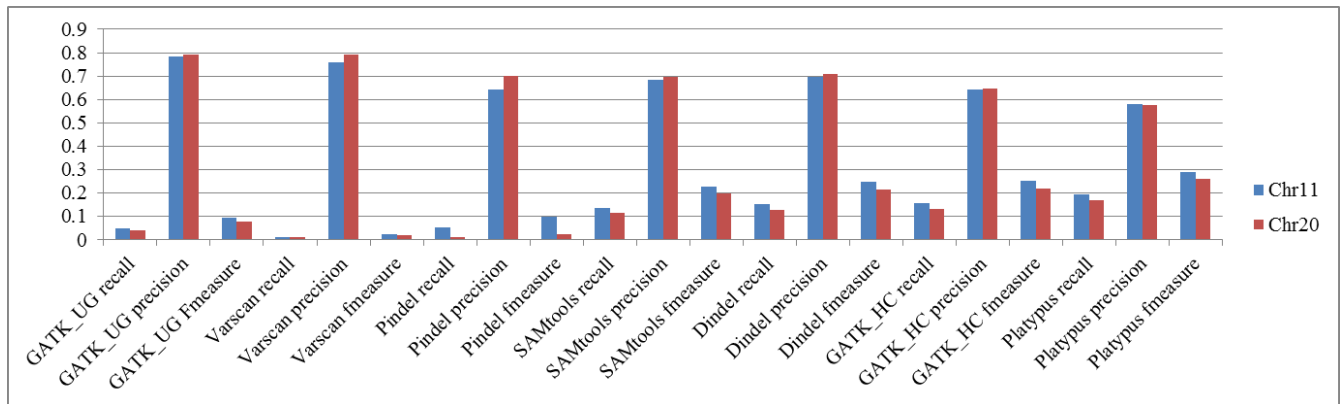

**Supplemental Figure 6:** Comparison between Chromosome 11 and Chromosome 20 for HG00157.

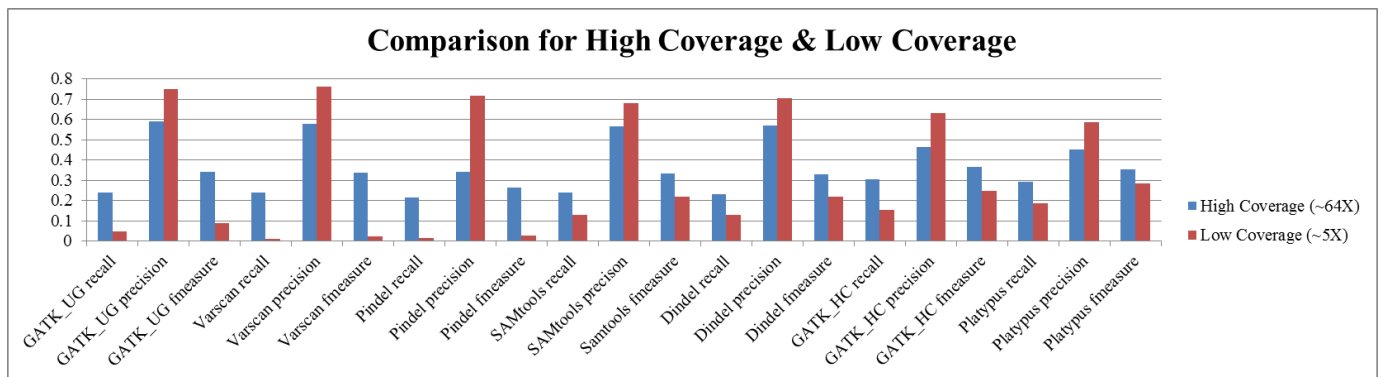

**Supplemental Figure 7:** Comparison between High (~64x) and Low (~5x) coverage samples for NA12878.
